# Supplementary material for: The Global Fisheries Subsidies Divide Between Small- and Large-Scale Fisheries
Source: Frontiers journal article supplement (doi:10.3389/fmars.2020.539214), 2020-09-29
Supplement: Table_1.DOCX [file Table_1.DOCX]

| **Category** | **Type** | **Sub-type** | **Definition** |
| --- | --- | --- | --- |
| Beneficial | Fishery Management Programs and Services | Fishery management programs | Management of fisheries in order to ensure continued productivity of resources and accomplishment of fisheries objectives, including; planning, consultation, decision-making, allocation of resources and effort, and formulation of regulations or rules which govern fisheries activities. |
| Stock enhancement | Enhancement or restoration of fish stocks over time as a result of direct intervention, including; habitat improvement and preservation, and the release of cultured organisms. |
| Stock assessment | Assessment of the status of fish stocks and the provision of scientific advice on management choices, rational harvest rates, controls and conservation measures. |
| Monitoring control and surveillance | Monitoring and control of fisheries activities to ensure adherence to regulations, including; collection of fisheries data and surveillance programs against illegal, unregulated and unreported activities. |
| Others | All other management services and activities not mentioned above. |
| Fisheries Research and Development | Fisheries research and development | Research, development and extension activities to increase the economic, social and environmental benefits of fishing, including; improving knowledge in harvesting rates, enhancing fishery resource base through scientific and technological breakthroughs, and adopting benign methods in fish harvesting. |
| Marine Protected Areas | Marine protected areas | Setting up and maintaining areas of the ocean set aside for long-term conservation aims. |
| Capacity- enhancing | Boat/Vessel Construction, Renewal and Modernisation | Financial support for boat/vessel or fleet renewal / modernisation | Interventions that lower the cost of borrowing for the construction, renewal, or modernisation of fishing vessels, including: concessional loans from banks, guarantees against default on commercial loans, loan restructuring, loans with lower than normal interest rates, and government funded loans. |
| Boat/vessel or fleet construction / renewal / modernisation | Direct financial support (e.g. grants) towards capital and operational costs for fishing vessel (and gear) construction, renewal, or modernisation, and/or direct provision of equipment. |
| Fishery Development Projects and Services | Development grants for fishery projects | Support towards fisheries enterprises, including support for fisheries development. |
| Institutional support and services | Provision of institutional support and services for day-to-day operations of the fisheries sector, including; baits programs, search and rescue programs, fish health, safety and quality control, and fisher training. |
| Port Construction and Renovation | Port and harbour construction and renovation | Provision, maintenance and improvement of ports, harbours and landing site infrastructure for fishing vessels. |
| Port and harbour access / other | Provision of moorage for fishing vessels, and any other access infrastructure including via land (e.g. road and rail) and water for the fisheries sector. |
| Marketing, Processing and Storage, Infrastructure and Support | State investments in firms, cooperatives and parastatals | Support and investment in the creation and operation of enterprises, parastatals and cooperatives in the fisheries sector, including but not limited to state-owned enterprises. |
| Subsidised lending for infrastructure and capital cost support | Provision of loans with concessional interest rates for the construction of infrastructure or for capital cost support. |
| Marketing support | Programmes of market interventions such as value addition, value chain development, export promotion and price support, that enhance the revenue generated from the fisheries sector. |
| Processing and storage infrastructure | Provision of infrastructure for the processing and storage of fishery products and fish auction facilities. |
| Others | All other capital and infrastructure support and services not mentioned above. |
| Tax Exemptions | Non-Fuel tax exemptions | Exemption or concessions of persons, people, property, income, or transactions, from taxes (other than on fuel) that would otherwise be levied on them. Including: tax exemptions and rebates on fishing inputs such as gear, income tax deferrals for fishers, accelerated depreciation of fishing vessels and gear, and favourable tax rates on fisheries inputs or outputs. |
| Fisheries Access Subsidies | Access fees for third country agreements | Securing fishing rights in foreign exclusive economic zones for the domestic fleet. |
| Fuel Subsidies | Fuel subsidies | Payments to directly subsidise the fisheries sector for the cost of fuel. |
| Tax concessions | Exemption or concessions of persons or people from normal rates of fuel tax. |
| Ambiguous | Fisher Assistance | Income support | Support to directly supplement the incomes of fishers and fisheries workers. |
| Fisher assistance | Support to indirectly supplement the incomes of fishers and fisheries workers, including: insurance programs for fishers and fish workers and other assistance programs. |
| Unemployment insurance | Insurance specifically for loss of earnings during the time that a fisher or fisheries workers is/are involuntarily unemployed. |
| Worker adjustment and retraining | Support to displaced fishers and fisheries workers to find alternative employment, and/or other retraining programs. |
| Other assistance | All other fisher assistance and support not mentioned above. |
| Vessel buybacks | Vessel buybacks | Payments for the permanent or temporary withdrawal of fishing vessels or vessel capacity units from a fleet to decrease capacity. |
| Permit and licence retirement | Payments for the permanent or temporary withdrawal of fishing permits and licences. |
| Other | All other decommissioning or capacity-removing programs not mentioned above. |
| Rural Fisheries Community Development | Rural fisheries community development | Services and activities that aim to improve the welfare and livelihoods of fishers living in rural areas, including grants and loans, credit through locals or cooperatives, and infrastructure or capacity building programs specifically targeted at rural or artisanal fishing communities. |
